# Supplementary material for: Features of Fractal Conformity and Bioconsolidation in the Early Myogenesis Gene Expression and Their Relationship to the Genetic Diversity of Chicken Breeds
Source: MDPI journal article supplement (doi:10.3390/ani13030521), 2023-02-01
Supplement: s1 [file s1]

**Table S1.** Rank distribution of the considered breast muscle genes according to the increasing level of their differential expression (after  $|FC - 1|$  transformation).

| Breed                  | Serial gene rank number (N) |                   |                 |                  |                  |                  |                   |
|------------------------|-----------------------------|-------------------|-----------------|------------------|------------------|------------------|-------------------|
|                        | 1                           | 2                 | 3               | 4                | 5                | 6                | 7                 |
| Broiler                | 5.59<br>(MEF2C)             | <b>5.63 (GHR)</b> | 6.46 (MYOG)     | 8.57 (MYF5)      | 10.31<br>(MYOD1) | 10.55<br>(MSTN)  | 41761.0<br>(MYH1) |
| White Cornish          | 1.19<br>(MYOD1)             | 1.91<br>(MEF2C)   | 3.89 (MSTN)     | 4.62 (GHR)       | 5.32 (MYOG)      | 17.22<br>(MYH1)  | 686.00<br>(MYF5)  |
| Plymouth Rock<br>White | 1.87<br>(MYOD1)             | 3.00<br>(MEF2C)   | 3.35 (GHR)      | 5.59 (MSTN)      | 5.76 (MYF5)      | 25.42<br>(MYH1)  | 77.25<br>(MYOG)   |
| Yurlov Crower          | 0.07 (MYH1)                 | 1.04<br>(MYOG)    | 6.90 (MYF5)     | 8.11<br>(MYOD1)  | 68.10 (GHR)      | 120.90<br>(MSTN) | 301.30<br>(MEF2C) |
| Brahma Buff            | 2.73 (MYH1)                 | 2.95<br>(MYOG)    | 9.57 (MYF5)     | 26.46<br>(MYOD1) | 30.78 (GHR)      | 40.07<br>(MSTN)  | 218.80<br>(MEF2C) |
| Orloff Mille<br>Fleur  | 1.33<br>(MEF2C)             | 1.41 (MSTN)       | 2.32 (GHR)      | 4.58 (MYOG)      | 15.11<br>(MYOD1) | 38.53 (MYF5)     | 16271.0<br>(MYH1) |
| Layer                  | 0.03 (MYOG)                 | 3.14<br>(MEF2C)   | 3.59<br>(MYOD1) | 3.72 (MSTN)      | 3.79 (GHR)       | 30.45<br>(MYH1)  | 67.26 (MYF5)      |
| Uzbek Game             | 0.18 (MSTN)                 | 0.45<br>(MEF2C)   | 1.51 (GHR)      | 5.47 (MYF5)      | 82.01<br>(MYOD1) | 107.90<br>(MYOG) | 11991.0<br>(MYH1) |

In all breeds, the specific color indicates the same genes taken to build a regression curve for each breed. However, only one gene (GHR) was included in the regression curves for all breeds. Rank 7 genes were not taken to plot the curves in Figures 1A, S1A and 2A.

**Table S2.** Rank distribution of the considered thigh muscle genes according to the increasing level of their differential expression (after  $|FC - 1|$  transformation).

| Breed                  | Serial gene rank number (N) |                 |                 |                  |                  |                   |                    |
|------------------------|-----------------------------|-----------------|-----------------|------------------|------------------|-------------------|--------------------|
|                        | 1                           | 2               | 3               | 4                | 5                | 6                 | 7                  |
| Broiler                | 1.36<br>(MEF2C)             | 2.07 (GHR)      | 2.86 (MSTN)     | 5.73 (MYOG)      | 7.45 (MYF5)      | 17.77<br>(MYOD1)  | 10021.00<br>(MYHI) |
| White Cornish          | 2.05 (GHR)                  | 2.69<br>(MEF2C) | 3.03 (MSTN)     | 13.13<br>(MYOD1) | 336.46<br>(MYHI) | 4641.00<br>(MYOG) | 25531.00<br>(MYF5) |
| Plymouth Rock<br>White | 0.39 (MYOG)                 | 1.95 (GHR)      | 2.02<br>(MEF2C) | 3.50 (MSTN)      | 12.18<br>(MYOD1) | 34.36 (MYF5)      | 116.36<br>(MYHI)   |
| Yurlov Crower          | 0.39 (MYOG)                 | 1.30 (MYHI)     | 25.10 (GHR)     | 27.44<br>(MYOD1) | 45.53 (MSTN)     | 194.36 (MYF5)     | 493.56<br>(MEF2C)  |
| Brahma Buff            | 0.37 (MYHI)                 | 2.72 (GHR)      | 3.70<br>(MYOG)  | 7.78<br>(MYOD1)  | 7.86 (MSTN)      | 37.02 (MYF5)      | 62.39<br>(MEF2C)   |
| Orloff Mille<br>Fleur  | 0.62 (GHR)                  | 0.78<br>(MEF2C) | 2.28 (MSTN)     | 2.63 (MYOG)      | 5.06<br>(MYOD1)  | 19.90 (MYF5)      | 8482.00<br>(MYHI)  |
| Layer                  | 0.08<br>(MYOD1)             | 0.25 (MSTN)     | 0.31 (GHR)      | 1.46 (MEF2C)     | 5.23 (MYHI)      | 79.25 (MYOG)      | 88.43 (MYF5)       |
| Uzbek Game             | 2.25 (MSTN)                 | 3.43 (MYF5)     | 3.92 (GHR)      | 5.79 (MEF2C)     | 14.93<br>(MYOD1) | 119.60<br>(MYOG)  | 17561.00<br>(MYHI) |

In all breeds, the specific color indicates the same genes taken to build a regression curve for each breed. However, only one gene (GHR) was included in the regression curves for all breeds. Genes of the 5th, 6th and 7th ranks were not taken to plot the curves in Figures 1B, S1B and 2B.

**Table S3.** Ordered (by descending) breed-specific values of the  $K(\text{br})$  coefficient in thigh muscles compared to body weight of chicks at 14 and 28 days.

| <b>Trait</b>           | <b>Yurlov Crower</b> | <b>Uzbek Game</b> | <b>Brahma Buff</b> | <b>Orloff Mille Fleur</b> | <b>Layer</b> | <b>Plymouth Rock White</b> | <b>White Cornish</b> | <b>Broiler</b> |
|------------------------|----------------------|-------------------|--------------------|---------------------------|--------------|----------------------------|----------------------|----------------|
| $K(\text{br})$         | 0.316                | 0.298             | 0.119              | 0.096                     | 0.070        | 0.061                      | 0.037                | 0.012          |
| Body weight at 14 days | 101.3                | 92.4              | 107.5              | 93.1                      | 79.8         | 265.2                      | 291.7                | 305.0          |
| Body weight at 28 days | 240.0                | 223.7             | 241.7              | 167.8                     | 222.4        | 1058.4                     | 1287.5               | 1157.0         |



|                     |            |                                                                |             |             |
|---------------------|------------|----------------------------------------------------------------|-------------|-------------|
| Breed type category | $p = 0.09$ | after normalization by natural logarithm, $p = 0.0244$ (ANOVA) | $p = 0.756$ | $p = 0.155$ |
|---------------------|------------|----------------------------------------------------------------|-------------|-------------|

<sup>1</sup> Abbreviations: BW1, BW14 and BW28, body weight at 1, 14 and 28 days; NOD, content of NO donors; Nitrate, nitrate content; NO oxidation, rate of NO oxidation to nitrate; GR2wk and GR4wk, growth rate for 2 and 4 weeks. The green color represents the results of calculations for the Spearman's correlation. Significant ( $p < 0.05$ ) and strongest associations are highlighted in yellow.

**Table S5.** Indicators  $K(br)$ ,  $K(th)$  and  $K(br)/K(th)$  depending on the utility type of breeds.

| Breed                                                        | Type                                                 | $K(br)$  | $K(th)$  | $K(br)/K(th)$     |
|--------------------------------------------------------------|------------------------------------------------------|----------|----------|-------------------|
| <i>No sorting</i>                                            |                                                      |          |          |                   |
| Broiler                                                      | Meat                                                 | 0.011950 | 0.081557 | 0.146523290459433 |
| White Cornish                                                | Meat                                                 | 0.03696  | 0.23305  | 0.158592576700279 |
| Plymouth Rock White                                          | Dual purpose (meat but also used for egg production) | 0.061148 | 0.07171  | 0.85271231348487  |
| Yurlov Crower                                                | Dual purpose (but has a game ancestor)               | 0.3160   | 0.5841   | 0.54100325286766  |
| Brahma Buff                                                  | Dual purpose (but has a game ancestor)               | 0.11900  | 0.15094  | 0.788392738836624 |
| Orloff Mille Fleur                                           | Dual purpose (but has a game ancestor)               | 0.096146 | 0.05711  | 1.6835230257398   |
| Layer                                                        | Egg                                                  | 0.069838 | 0.025535 | 2.73499118856472  |
| Uzbek Game                                                   | Game                                                 | 0.29769  | 0.06069  | 4.90509144834404  |
| <i>Sorted in ascending order by <math>K(br)</math></i>       |                                                      |          |          |                   |
| Broiler                                                      | Meat                                                 | 0.011950 | 0.081557 | 0.146523290459433 |
| White Cornish                                                | Meat                                                 | 0.03696  | 0.23305  | 0.158592576700279 |
| Plymouth Rock White                                          | Dual purpose (meat but also used for egg production) | 0.061148 | 0.07171  | 0.85271231348487  |
| Layer                                                        | Egg                                                  | 0.069838 | 0.025535 | 2.73499118856472  |
| Orloff Mille Fleur                                           | Dual purpose (but has a game ancestor)               | 0.096146 | 0.05711  | 1.6835230257398   |
| Brahma Buff                                                  | Dual purpose (but has a game ancestor)               | 0.11900  | 0.15094  | 0.788392738836624 |
| Uzbek Game                                                   | Game                                                 | 0.29769  | 0.06069  | 4.90509144834404  |
| Yurlov Crower                                                | Dual purpose (but has a game ancestor)               | 0.3160   | 0.5841   | 0.54100325286766  |
| <i>Sorted in ascending order by <math>K(th)</math></i>       |                                                      |          |          |                   |
| Layer                                                        | Egg                                                  | 0.069838 | 0.025535 | 2.73499118856472  |
| Orloff Mille Fleur                                           | Dual purpose (but has a game ancestor)               | 0.096146 | 0.05711  | 1.6835230257398   |
| Uzbek Game                                                   | Game                                                 | 0.29769  | 0.06069  | 4.90509144834404  |
| Plymouth Rock White                                          | Dual purpose (meat but also used for egg production) | 0.061148 | 0.07171  | 0.85271231348487  |
| Broiler                                                      | Meat                                                 | 0.011950 | 0.081557 | 0.146523290459433 |
| Brahma Buff                                                  | Dual purpose (but has a game ancestor)               | 0.11900  | 0.15094  | 0.788392738836624 |
| White Cornish                                                | Meat                                                 | 0.03696  | 0.23305  | 0.158592576700279 |
| Yurlov Crower                                                | Dual purpose (but has a game ancestor)               | 0.3160   | 0.5841   | 0.54100325286766  |
| <i>Sorted in ascending order by <math>K(br)/K(th)</math></i> |                                                      |          |          |                   |
| Broiler                                                      | Meat                                                 | 0.011950 | 0.081557 | 0.146523290459433 |
| White Cornish                                                | Meat                                                 | 0.03696  | 0.23305  | 0.158592576700279 |
| Yurlov Crower                                                | Dual purpose (but has a game ancestor)               | 0.3160   | 0.5841   | 0.54100325286766  |
| Brahma Buff                                                  | Dual purpose (but has a game ancestor)               | 0.11900  | 0.15094  | 0.788392738836624 |
| Plymouth Rock White                                          | Dual purpose (meat but also used for egg production) | 0.061148 | 0.07171  | 0.85271231348487  |
| Orloff Mille Fleur                                           | Dual purpose (but has a game ancestor)               | 0.096146 | 0.05711  | 1.6835230257398   |
| Layer                                                        | Egg                                                  | 0.069838 | 0.025535 | 2.73499118856472  |
| Uzbek Game                                                   | Game                                                 | 0.29769  | 0.06069  | 4.90509144834404  |

For groups highlighted in yellow and green, color coding allows you to see if the order of breed types is preserved when ranking by different  $K$ .

**Table S6.** Coefficients and FC values of the *GHR* gene when sorted by MGEI\* and depending on the utility type of breeds.

| <b>Breed</b>        | <b>Type</b>  | <b><i>K</i>(br)</b> | <b><i>K</i>(th)</b> | <b>MGEI</b>       | <b>FC (<i>GHR</i>)</b> |
|---------------------|--------------|---------------------|---------------------|-------------------|------------------------|
| Broiler             | Meat         | 0.011950            | 0.081557            | 0.146523290459433 | 6.63                   |
| White Cornish       | Meat         | 0.03696             | 0.23305             | 0.158592576700279 | 5.62                   |
| Yurlov Crower       | Dual purpose | 0.3160              | 0.5841              | 0.54100325286766  | 69.1                   |
| Brahma Buff         | Dual purpose | 0.11900             | 0.15094             | 0.788392738836624 | 31.78                  |
| Plymouth Rock White | Dual purpose | 0.061148            | 0.07171             | 0.85271231348487  | 4.35                   |
| Orloff Mille Fleur  | Dual purpose | 0.096146            | 0.05711             | 1.6835230257398   | 3.32                   |
| Layer               | Egg          | 0.069838            | 0.025535            | 2.73499118856472  | 4.79                   |
| Uzbek Game          | Game         | 0.29769             | 0.06069             | 4.90509144834404  | 2.51                   |

\* MGEI =  $K(\text{br})/K(\text{th})$ .

**Table S7.** Dynamics of changes in the body weight of chicks over a 4-week period.

| Breed               | Body weight, g |         |         |
|---------------------|----------------|---------|---------|
|                     | 1 day          | 14 days | 28 days |
| Broiler             | 47.5           | 305.0   | 1157.0  |
| White Cornish       | 49.3           | 291.7   | 1287.5  |
| Plymouth Rock White | 44.9           | 265.2   | 1058.4  |
| Yurlov Crower       | 39.0           | 101.3   | 240     |
| Brahma Buff         | 38.2           | 107.5   | 241.7   |
| Orloff Mille Fleur  | 35.5           | 93.1    | 167.8   |
| Layer               | 42.4           | 79.8    | 222.4   |
| Uzbek Game          | 41.3           | 92.4    | 223.7   |

The color combines breeds with approximately the same growth rate.



**Table S8.** Dynamics of changes in body weight and growth rate of chicks over 2- and 4-week periods in comparison with the FC values of the *GHR* gene.

| Breed               | Body weight, g |       |        | Growth rate |            | FC ( <i>GHR</i> ) |
|---------------------|----------------|-------|--------|-------------|------------|-------------------|
|                     |                |       |        | 2 weeks     | 4 weeks    |                   |
| Layer               | 42.4           | 79.8  | 222.4  | 1.88207547  | 5.24528302 | 4.79              |
| Uzbek Game          | 41.3           | 92.4  | 223.7  | 2.23728814  | 5.41646489 | 2.51              |
| Yurlov Crower       | 39.0           | 101.3 | 240.0  | 2.5974359   | 6.15384615 | 69.1              |
| Orloff Mille Fleur  | 35.5           | 93.1  | 167.8  | 2.62253521  | 4.72676056 | 3.32              |
| Brahma Buff         | 38.2           | 107.5 | 241.7  | 2.81413613  | 6.32722513 | 31.78             |
| Plymouth Rock White | 44.9           | 265.2 | 1058.4 | 5.9064588   | 23.5723831 | 4.35              |
| White Cornish       | 49.3           | 291.7 | 1287.5 | 5.9168357   | 26.1156187 | 5.62              |
| Broiler             | 47.5           | 305.0 | 1157.0 | 6.42105263  | 24.3578947 | 6.63              |

Note: Data sorted in ascending 2-week growth rate.

**Table S9.** Spearman correlation coefficient values for 11 indicators of growth, NO metabolism and myogenesis across all the breeds studied.

| Trait <sup>1</sup> | BW1         | BW14        | BW28        | GR2wk      | GR4wk       | NOD         | Nitrate    | NO oxidation | K(br)      | K(th)      | MGEI*      |
|--------------------|-------------|-------------|-------------|------------|-------------|-------------|------------|--------------|------------|------------|------------|
| BW1                | 1.0000000   | 0.5714286   | 0.7619048   | 0.5238095  | 0.7619048   | -0.33333333 | 0.5707646  | 0.6227657    | -0.7619048 | 0.19047619 | -0.4523810 |
| BW14               | 0.5714286   | 1.0000000   | 0.9047619   | 0.9761905  | 0.9047619   | -0.33333333 | 0.5580809  | 0.5389318    | -0.6428571 | 0.61904762 | -0.8809524 |
| BW28               | 0.7619048   | 0.9047619   | 1.0000000   | 0.8333333  | 1.0000000   | -0.33333333 | 0.6722338  | 0.6347419    | -0.5952381 | 0.66666667 | -0.7857143 |
| GR2wk              | 0.5238095   | 0.9761905   | 0.8333333   | 1.0000000  | 0.8333333   | -0.40476190 | 0.5580809  | 0.5628843    | -0.7142857 | 0.47619048 | -0.8095238 |
| GR4wk              | 0.7619048   | 0.9047619   | 1.0000000   | 0.8333333  | 1.0000000   | -0.33333333 | 0.6722338  | 0.6347419    | -0.5952381 | 0.66666667 | -0.7857143 |
| NOD                | -0.33333333 | -0.33333333 | -0.33333333 | -0.4047619 | -0.33333333 | 1.00000000  | -0.8624887 | -0.8982197   | 0.4047619  | 0.04761905 | 0.1904762  |
| Nitrate            | 0.5707646   | 0.5580809   | 0.6722338   | 0.5580809  | 0.6722338   | -0.86248869 | 1.0000000  | 0.8931885    | -0.4312443 | 0.36782606 | -0.4692953 |
| NO oxidation       | 0.6227657   | 0.5389318   | 0.6347419   | 0.5628843  | 0.6347419   | -0.89821970 | 0.8931885  | 1.0000000    | -0.5628843 | 0.09581010 | -0.3113828 |
| K(br)              | -0.7619048  | -0.6428571  | -0.5952381  | -0.7142857 | -0.5952381  | 0.40476190  | -0.4312443 | -0.5628843   | 1.0000000  | 0.09523810 | 0.4761905  |
| K(th)              | 0.1904762   | 0.6190476   | 0.6666667   | 0.4761905  | 0.6666667   | 0.4761905   | 0.3678261  | 0.0958101    | 0.0952381  | 1.0000000  | -0.7619048 |

|      |            |            |            |            |            |            |            |            |           |             |           |
|------|------------|------------|------------|------------|------------|------------|------------|------------|-----------|-------------|-----------|
| MGEI | -0.4523810 | -0.8809524 | -0.7857143 | -0.8095238 | -0.7857143 | 0.19047619 | -0.4692953 | -0.3113828 | 0.4761905 | -0.76190476 | 1.0000000 |
|------|------------|------------|------------|------------|------------|------------|------------|------------|-----------|-------------|-----------|

<sup>1</sup> BW1, BW14 и BW28, body weight at 1, 14 and 28 days; GR2wk and GR4wk, growth rate for 2 and 4 weeks; NOD, content of NO donors; Nitrate, content of nitrate; NO oxidation, rate of NO oxidation to nitrate; K(br), coefficient K in the breast muscles; K(th), K coefficient in the thigh muscles; MGEI, myogenesis gene expression index, equal to K(br)/K(th) ratio. Yellow highlighted are significant correlation values (*p* < 0.05; see Table 14).

**Table S10.** Spearman correlation *p*-values for 11 indicators shown in Supplementary Table S9.

| Trait <sup>1</sup> | BW1            | BW14             | BW28              | GR2wk            | GR4wk             | NOD             | Nitrate         | NO oxidation    | K(br)           | K(th)           | MGEI*           |
|--------------------|----------------|------------------|-------------------|------------------|-------------------|-----------------|-----------------|-----------------|-----------------|-----------------|-----------------|
| BW1                | 0.000000<br>00 | 0.1511408<br>730 | 0.0367559<br>5    | 0.1966269<br>841 | 0.0367559<br>5    | 0.427876<br>984 | 0.1395252<br>73 | 0.09910080<br>8 | 0.03675<br>595  | 0.6645833<br>3  | 0.2674603<br>17 |
| BW14               | 0.151140<br>87 | 0.0000000<br>000 | 0.0045634<br>92   | 0.0003968<br>254 | 0.0045634<br>92   | 0.427876<br>984 | 0.1505681<br>77 | 0.16811803<br>5 | 0.09618<br>056  | 0.1149801<br>6  | 0.0072420<br>63 |
| BW28               | 0.036755<br>95 | 0.0045634<br>921 | 0.0000000<br>00   | 0.0153769<br>841 | 0.0000496<br>0317 | 0.427876<br>984 | 0.0678088<br>87 | 0.09089043<br>6 | 0.13229<br>167  | 0.0830853<br>2  | 0.0279265<br>87 |
| GR2wk              | 0.196626<br>98 | 0.0003968<br>254 | 0.0153769<br>8    | 0.0000000<br>000 | 0.0153769<br>8    | 0.326835<br>317 | 0.1505681<br>77 | 0.14633153<br>3 | 0.05758<br>929  | 0.2430555<br>6  | 0.0217757<br>94 |
| GR4wk              | 0.036755<br>95 | 0.0045634<br>921 | 0.0000496<br>0317 | 0.0153769<br>841 | 0.0000000<br>00   | 0.427876<br>984 | 0.0678088<br>87 | 0.09089043<br>6 | 0.13229<br>167  | 0.0830853<br>2  | 0.0279265<br>87 |
| NOD                | 0.427876<br>98 | 0.4278769<br>841 | 0.4278770         | 0.3268353<br>175 | 0.4278770         | 0.000000<br>000 | 0.0058486<br>33 | 0.00243879<br>7 | 0.32683<br>532  | 0.9348710<br>3  | 0.6645833<br>33 |
| Nitrate            | 0.139525<br>27 | 0.1505681<br>771 | 0.0678088<br>9    | 0.1505681<br>771 | 0.0678088<br>9    | 0.005848<br>633 | 0.0000000<br>00 | 0.00280761<br>5 | 0.28607<br>285  | 0.3700079<br>9  | 0.2407310<br>06 |
| NO oxidation       | 0.099100<br>81 | 0.1681180<br>353 | 0.0908904<br>4    | 0.1463315<br>326 | 0.0908904<br>4    | 0.002438<br>797 | 0.0028076<br>15 | 0.00000000<br>0 | 0.14633<br>153  | 0.8214524<br>0  | 0.4527987<br>57 |
| K(br)              | 0.036755<br>95 | 0.0961805<br>556 | 0.1322917         | 0.0575892<br>857 | 0.1322917         | 0.326835<br>317 | 0.2860728<br>54 | 0.14633153<br>3 | 0.00000<br>0000 | 0.8401289<br>7  | 0.2430555<br>56 |
| K(th)              | 0.664583<br>33 | 0.1149801<br>587 | 0.0830853<br>2    | 0.2430555<br>556 | 0.0830853<br>2    | 0.934871<br>03  | 0.3700079<br>9  | 0.82145240      | 0.84012<br>897  | 0.0000000<br>00 | 0.0367559<br>5  |
| MGEI               | 0.267460<br>32 | 0.0072420<br>635 | 0.0279265<br>9    | 0.0217757<br>937 | 0.0279265<br>9    | 0.664583<br>333 | 0.2407310<br>06 | 0.45279875<br>7 | 0.24305<br>556  | 0.0367559<br>5  | 0.0000000<br>00 |

<sup>1</sup> BW1, BW14 и BW28, body weight at 1, 14 and 28 days; GR2wk and GR4wk, growth rate for 2 and 4 weeks; NOD, content of NO donors; Nitrate, content of nitrate; NO oxidation, rate of NO oxidation to nitrate; K(br), coefficient K in the breast muscles; K(th), K coefficient in the thigh muscles; MGEI, myogenesis gene expression index, equal to K(br)/K(th) ratio. Yellow highlighted are significant *p*-values (*p* < 0.05).

**Table S11.** Summary table for comparing coefficients  $D$ ,  $K$ ,  $MGEFDI$  and  $MGEI$ .

| Breed (type)       | $D(\text{br})$                   | $D(\text{th})$    | $K(\text{br})$<br>N[1:6] | $K(\text{th})$<br>N[1:4] | $MGEFDI = D(\text{br})/D(\text{th})$ | $MGEI = K(\text{br})/K(\text{th})$ | FC<br>(GHR) | BW1  | BW14  | BW28   |
|--------------------|----------------------------------|-------------------|--------------------------|--------------------------|--------------------------------------|------------------------------------|-------------|------|-------|--------|
| BR (meat)          | 0.39935<br>N[1:6]                | 0.95423<br>N[1:4] | 0.011950                 | 0.081557                 | 0.418504972595705                    | 0.146523290459433                  | 6.63        | 47.5 | 305.0 | 1157   |
| WC (meat)          | 1.28919<br>N[1:6]                | 11.2111<br>N[3:7] | 0.03696                  | 0.23305                  | 0.1149922844                         | 0.158592576700279                  | 5.62        | 49.3 | 291.7 | 1287.5 |
| PRW (dual purpose) | 1.1474 N[1:6]/<br>0.71703 N[1:4] | 1.5086<br>N[1:4]  | 0.061148                 | 0.07171                  | 0.475294975473949                    | 0.85271231348487                   | 4.35        | 44.9 | 265.2 | 1058.4 |
| YC (dual purpose)  | 4.1035<br>N[1:6]                 | 3.3772<br>N[1:4]  | 0.3160                   | 0.5841                   | 1.215059812862727                    | 0.54100325286766                   | 69.1        | 39.0 | 101.3 | 240    |
| BB (dual purpose)  | 1.7033 N[1:6]/<br>2.9682 N[2:7]  | 2.1218<br>N[1:4]  | 0.11900                  | 0.15094                  | 1.398906588745405                    | 0.788392738836624                  | 31.78       | 38.2 | 107.5 | 241.7  |
| OMF (dual purpose) | 1.7867 N[1:6]/<br>2.9835 N[2:6]  | 1.1325<br>N[1:4]  | 0.096146                 | 0.05711                  | 2.634437086092715                    | 1.6835230257398                    | 3.32        | 35.5 | 93.1  | 167.8  |
| LR (egg)           | 3.1087<br>N[1:6]                 | 1.8585<br>N[1:4]  | 0.069838                 | 0.025535                 | 1.672693032015066                    | 2.73499118856472                   | 4.79        | 42.4 | 79.8  | 222.4  |
| UG (game)          | 3.7397<br>N[1:6]                 | 0.63220<br>N[1:4] | 0.29769                  | 0.06069                  | 5.915374881366656                    | 4.90509144834404                   | 2.51        | 41.3 | 92.4  | 223.7  |

$D(\text{br})$  and  $D(\text{th})$ , fractal dimension coefficients for breast and thigh muscles based on formula (2);  $K(\text{br})$  and  $K(\text{th})$ , coefficients for breast and thigh muscles based on formula (1).

**Table S12.** Expression levels of myogenesis genes (fold change values) in the tissues of the breast and thigh muscles of E14 chick embryos on the example of the WC breed.

| Muscles | Genes*     |             |            |              |              |             |             |             |
|---------|------------|-------------|------------|--------------|--------------|-------------|-------------|-------------|
|         | <i>TBP</i> | <i>MSTN</i> | <i>GHR</i> | <i>MEF2C</i> | <i>MYOD1</i> | <i>MYOG</i> | <i>MYH1</i> | <i>MYF5</i> |
|         | 1          | 2           | 3          | 4            | 5            | 6           | 7           | 8           |
| Breast  | 1          | 4.89        | 5.62       | 2.91         | 2.19         | −4.32       | −16.22      | −685.02     |
| Thigh   | 1          | 4.03        | 3.05       | −1.69        | −12.13       | −4640.29    | −335.46     | −25531.63   |

\* *TBP*, TATA-binding protein (internal control); *MSTN*, myostatin; *GHR*, growth hormone receptor; *MEF2C*, myocyte proliferation factor 2c; *MYOD1*, myogenic differentiation 1; *MYH1*, myosin; *MYOG*, myogenin; *MYF5*, myogenesis factor 5.

**Table S13.** Transformation of numerical indicators of fold change (FC) for gene expression in the breast muscles of WC chick embryos into Y- and X-coordinates of points representing genes in a fractal portrait.

| Indicators                          | Genes*     |             |            |              |              |             |             |             |
|-------------------------------------|------------|-------------|------------|--------------|--------------|-------------|-------------|-------------|
|                                     | <i>TBP</i> | <i>MSTN</i> | <i>GHR</i> | <i>MEF2C</i> | <i>MYOD1</i> | <i>MYOG</i> | <i>MYH1</i> | <i>MYF5</i> |
|                                     | 1          | 2           | 3          | 4            | 5            | 6           | 7           | 8           |
| FC                                  | 1          | 4.89        | 5.62       | 2.91         | 2.19         | -4.32       | -16.22      | -685        |
| LG**                                | 0          | -2.29       | -2.49      | -1.54        | -1.13        | 2.11        | 4.02        | 9.42        |
| Y-coordinate = $LG - LG_{\min}$ *** | 2.49       | 0.2         | 0          | 0.95         | 1.36         | 4.6         | 6.51        | 11.91       |
| X- coordinate****                   | 0.49       | 0.2         | 0          | 0.95         | 0.36         | 0.6         | 0.51        | 0.91        |

\* The designation of genes is the same as in Table 2. \*\* LG is calculated by formula (6). \*\*\* Minimum value  $LG_{\min} = LG_{GHR} = -2.49$ . \*\*\*\* X-coordinate is equal to the fractional part of the decimal number corresponding to the Y-coordinate.

**Table S14.** Correlation of the bioconsolidation index with the phenotypic characteristics of embryos and chicks of various chicken breeds.

| Breed                                                      | Egg weight, g | Body weight of chicks, g |         |         | Content of NO metabolites in E7 embryos |       |       | Ind   |
|------------------------------------------------------------|---------------|--------------------------|---------|---------|-----------------------------------------|-------|-------|-------|
|                                                            |               | 1 day                    | 14 days | 28 days | Nitrates                                | NODs  | Sum   |       |
| Broiler                                                    | 64.8          | 47.5                     | 305.0   | 1157.0  | 145.4                                   | 3.3   | 148.7 | 0.38  |
| White Cornish                                              | 65.8          | 49.3                     | 291.7   | 1287.5  | 152.2                                   | 9.5   | 161.7 | 0.75  |
| Plymouth Rock White                                        | 64.3          | 44.9                     | 265.2   | 1058.4  | 0.0                                     | 141.8 | 145.0 | 0.48  |
| Yurlov Crower                                              | 60.4          | 39.0                     | 101.3   | 240.0   | 0.0                                     | 149.6 | 149.6 | 0.38  |
| Brahma Buff                                                | 60.4          | 38.2                     | 107.5   | 241.7   | 100.0                                   | 36.0  | 136.0 | 0.00  |
| Orloff Mille Fleur                                         | 51.7          | 35.5                     | 93.1    | 167.8   | 0.0                                     | 131.5 | 131.5 | 0.00  |
| Layer                                                      | 64.2          | 42.4                     | 79.8    | 222.4   | 0.0                                     | 138.9 | 138.9 | 0.00  |
| Uzbek Game                                                 | 55.7          | 41.3                     | 92.4    | 223.7   | 143.4                                   | 8.8   | 152.2 | 0.38  |
| Standard error                                             | ±0.8          | ±3.1                     | ±19.2   | ±50.0   | ±8.3                                    | ±9.4  | ±12.5 | ±0.03 |
| Correlation coefficient with Ind (±0.02)                   | 0.48          | 0.76                     | 0.73    | 0.77    | 0.27                                    | −0.17 | 0.89  | 1.00  |
| Correlation coefficient with sum of NO metabolites (±0.02) | 0.45          | 0.72                     | 0.51    | 0.56    | —                                       | —     | 1.00  | 0.89  |
