# Supplementary material for: Features of Fractal Conformity and Bioconsolidation in the Early Myogenesis Gene Expression and Their Relationship to the Genetic Diversity of Chicken Breeds
Source: MDPI journal article supplement (doi:10.3390/ani13030521), 2023-02-01
Supplement: s1 [file s1]

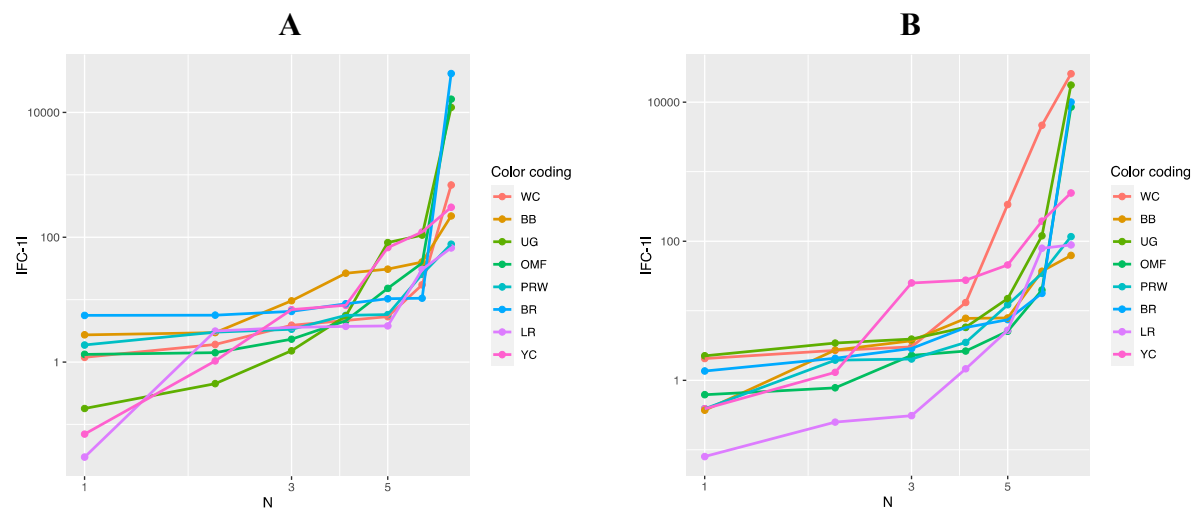

**Figure S1.** Log-log plots of  $|FC - 1|(N)$  dependencies for gene expression data (Table 2) in the breeds by muscle type. **(A)** Breast muscles; **(B)** thigh muscles.

**A1a**

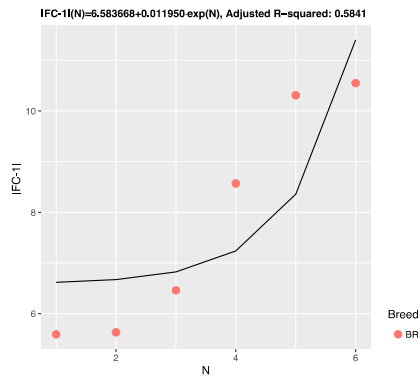

**A2**

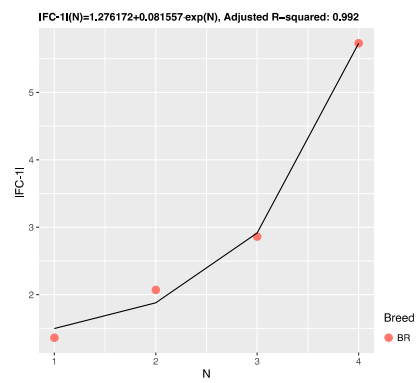

**A1b**

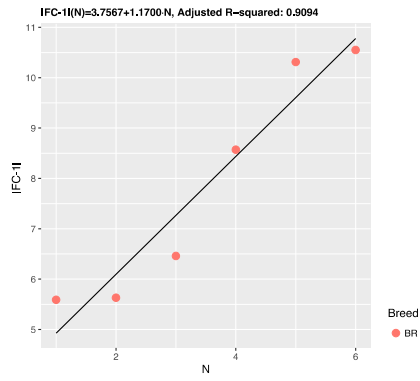

**B1**

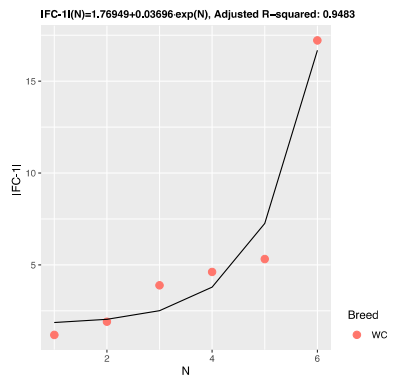

**B2**

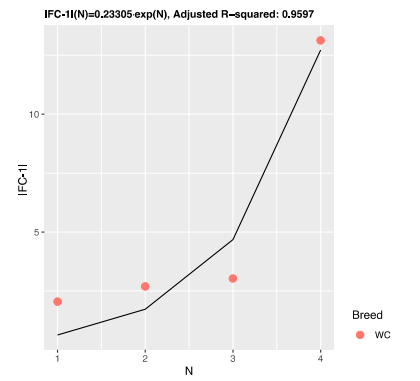

**C1**

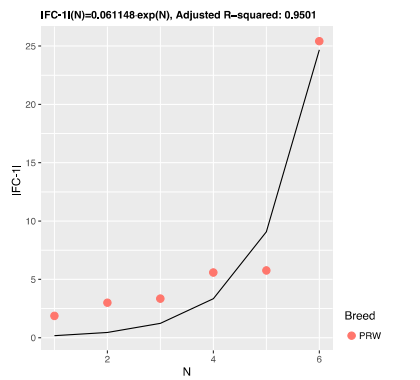

**C2**

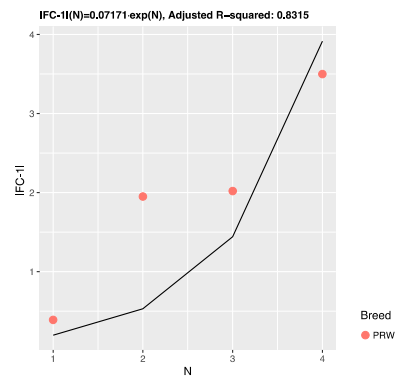

**D1**

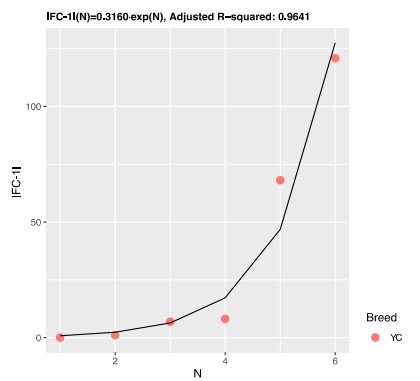

**D2**

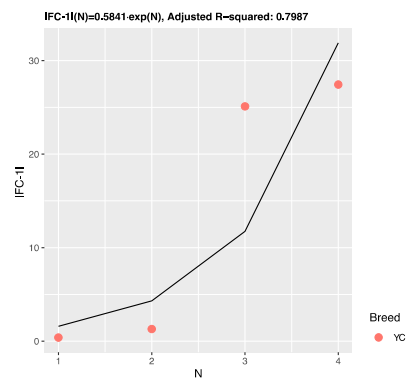

**E1a**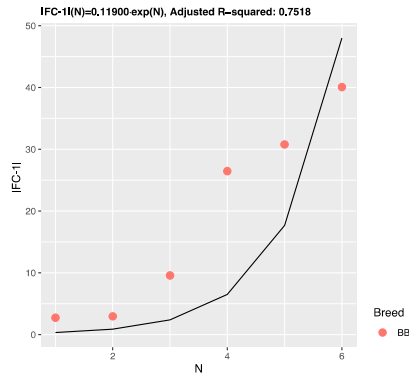**E1b**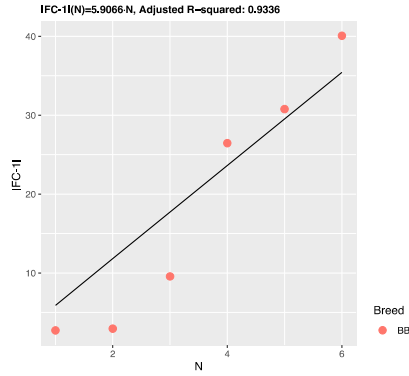**E2**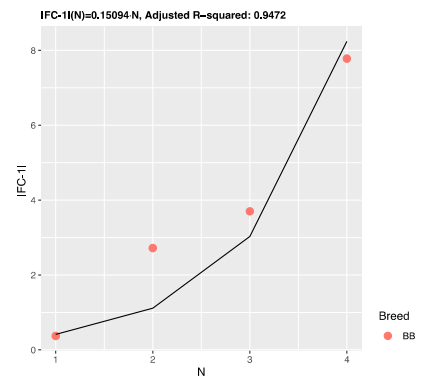**F1**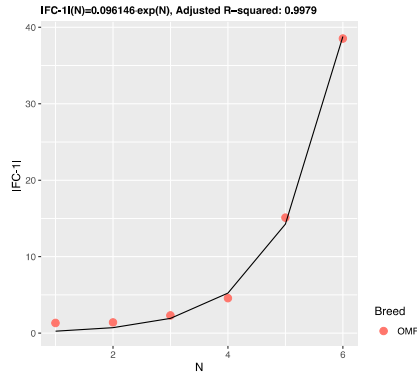**F2**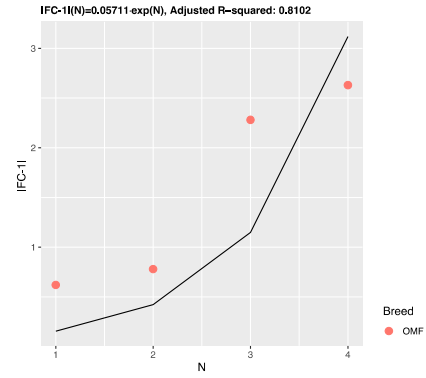**G1**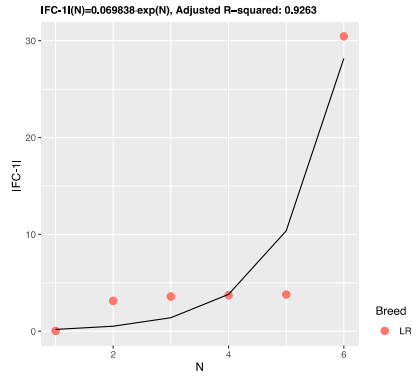**G2**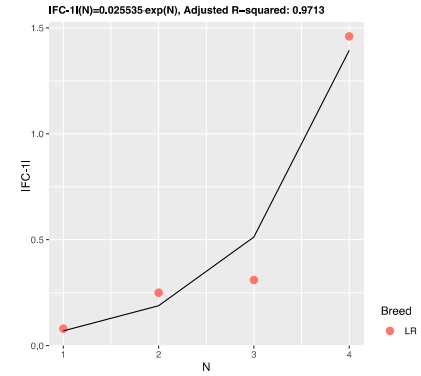**H1**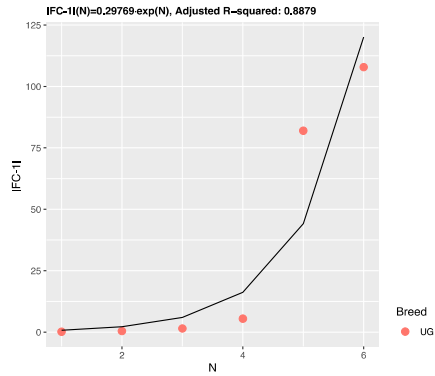**H2**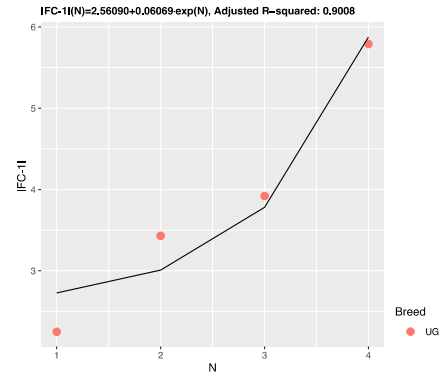

**Figure S2.** Special cases of  $|FC - 1|(N)$  regressions for different breeds by muscle groups. (A1–H1) Breast muscles; (A2–H2) thigh muscles. For the breeds BR (A1b) and BB (E1b), linear models have also been tested.

A1

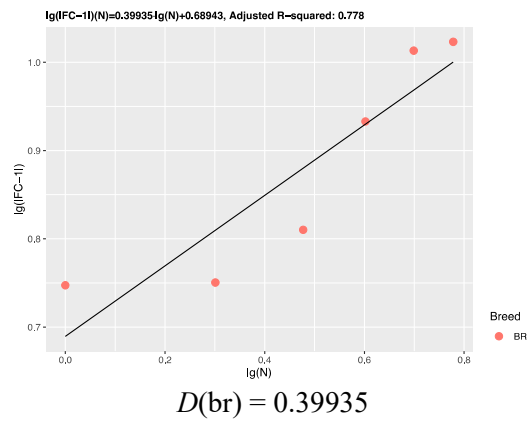

A2

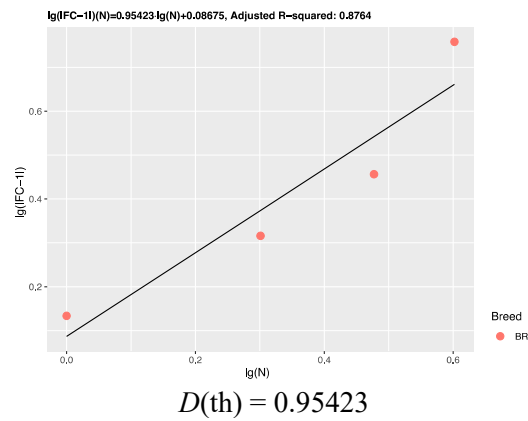

B1

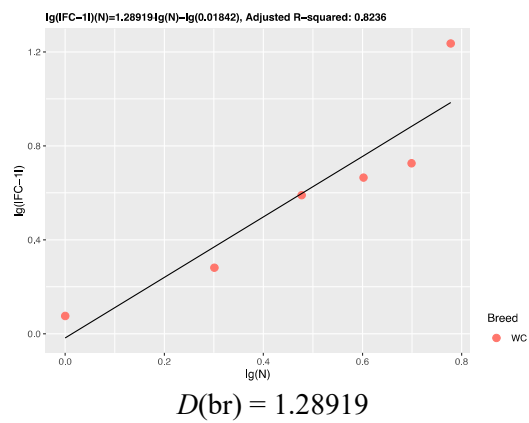

B2a

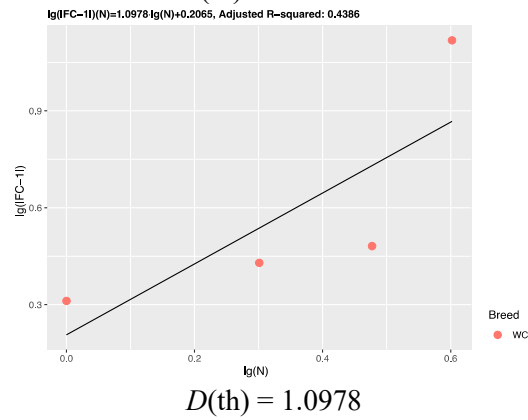

B2b

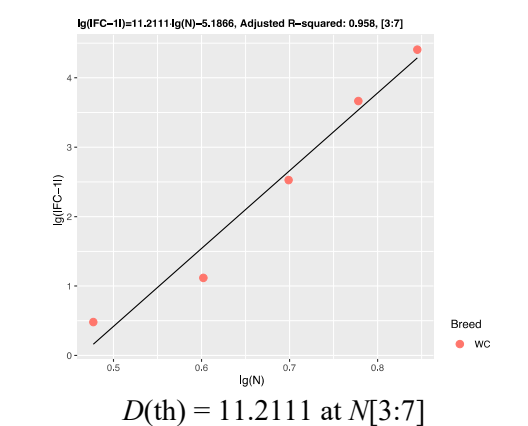

C1a

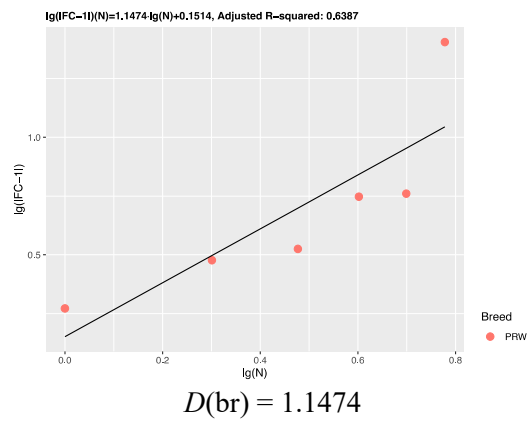

C2

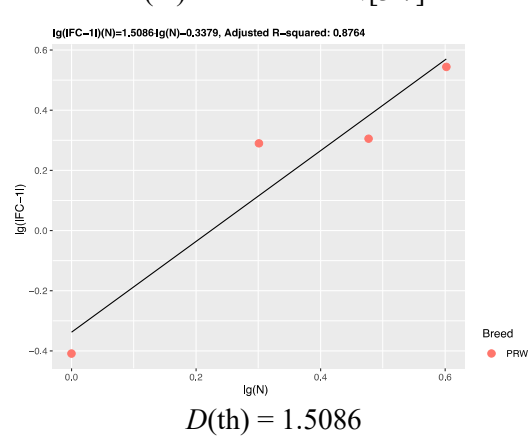

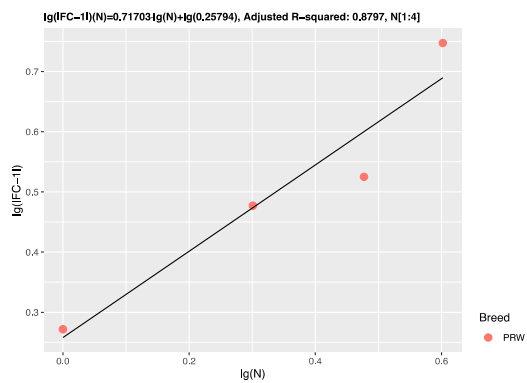

**D1**

$$D(\text{br}) = 0.71703 \text{ at } N[1:4]$$

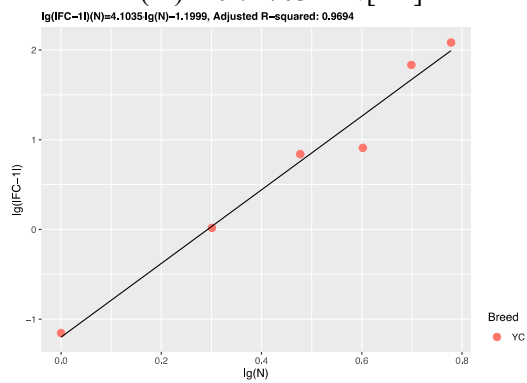

**D2**

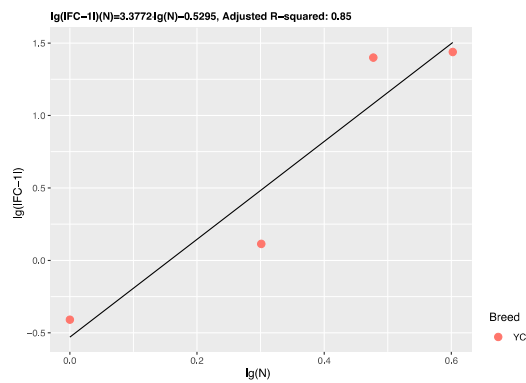

**E1a**

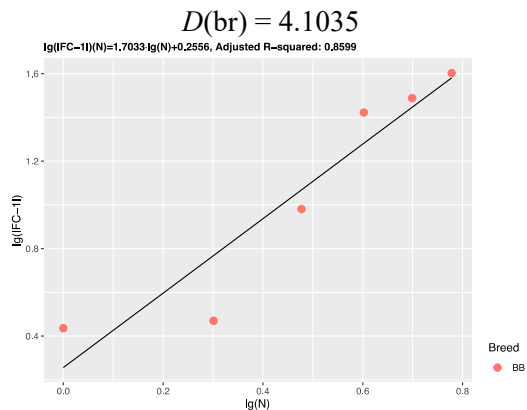

$$D(\text{br}) = 1.7033$$

**E1b**

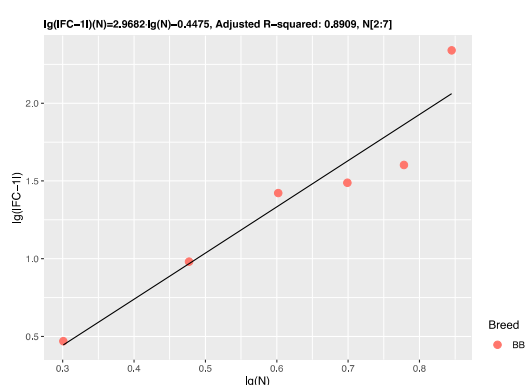

$$D(\text{br}) = 2.9682 \text{ at } N[2:7]$$

**E2**

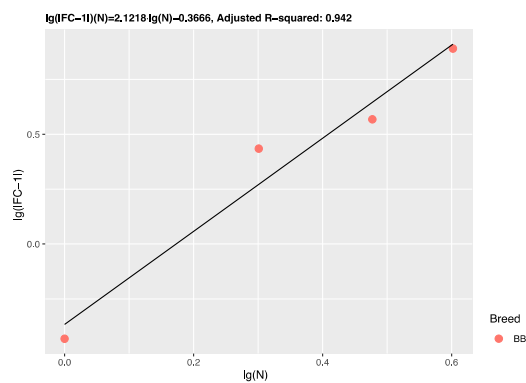

$$D(\text{th}) = 2.1218$$

**F1a**

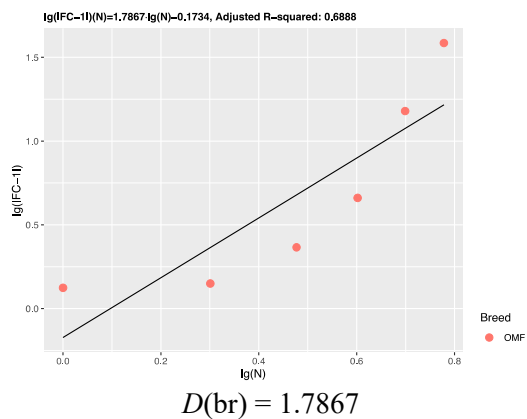

**F1b**

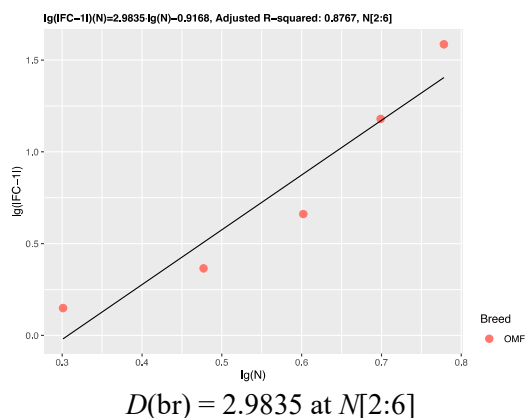

**G1**

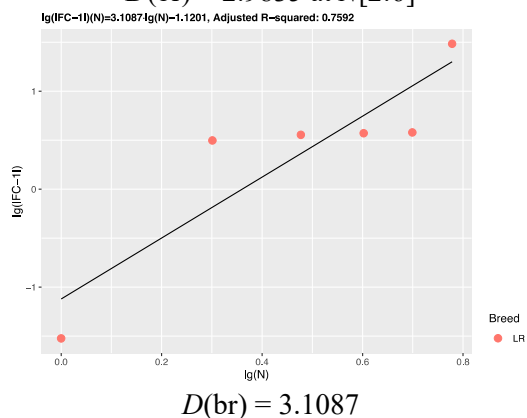

**H1**

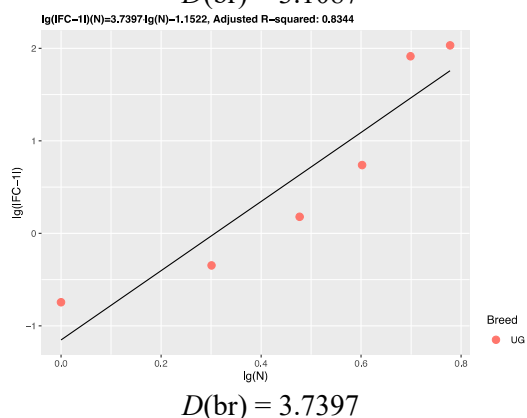

**F2**

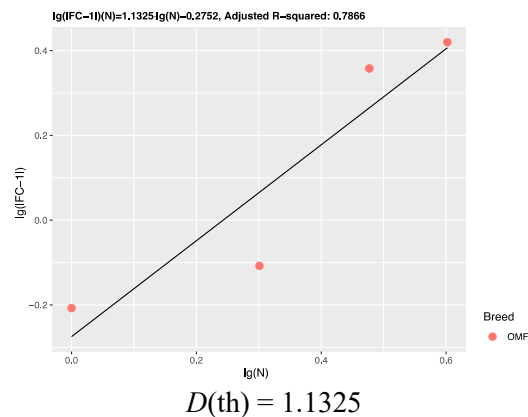

**G2**

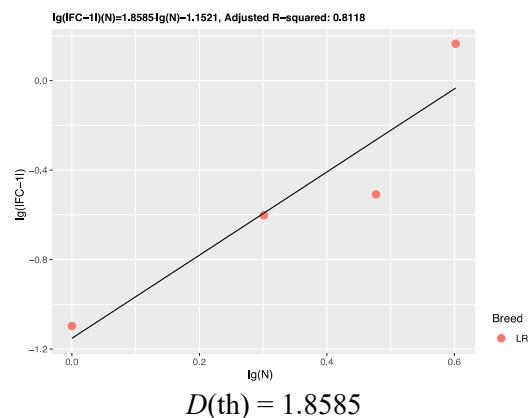

**H2**

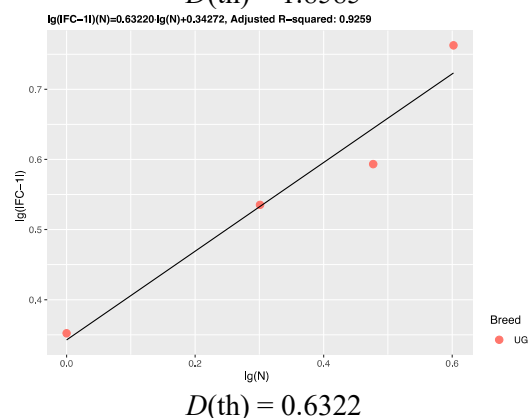

**Figure S3.** Estimation of fractal dimension coefficients  $D$ : approximation of dependence  $\lg(|FC - 1|)$  on  $\lg(N)$  and determination of fractality index for gene expression of breast (br) and thigh (th) muscles in different breeds. (A1–H1) Breast muscles at  $N[1:6]$ ; (A2–H2) thigh muscles at  $N[1:4]$ . For the breeds WC (B2b), PRW (C1b), BB (E1b) and OMF (F1b), different and more optimal ranges of gene ranks ( $N$ ) have also been tested.
