# Supplementary material for: Features of Fractal Conformity and Bioconsolidation in the Early Myogenesis Gene Expression and Their Relationship to the Genetic Diversity of Chicken Breeds
Source: Animals (Basel). 2023 Feb 1;13(3):521. doi: 10.3390/ani13030521 (PMC9913260; doi:10.3390/ani13030521)
Supplement: Supplementary file 1 [file animals-13-00521-s001.zip]

Archive with 6 entries (6 files):
- Supplementary Fig. S4.pdf
- Supplementary Figures S1-S3 edited.pdf
- Supplementary Information S1 edited.pdf
- Supplementary Information S2 edited.pdf
- Supplementary Information S3.pdf
- Supplementary Tables S1-S14 edited.pdf
